# Supplementary material
Source: Copernicus journal article supplement (doi:10.5194/egusphere-2026-1608)
Supplement: Supplementary file 1 [file egusphere-2026-1608-supplement.pdf]

# Supplement Materials

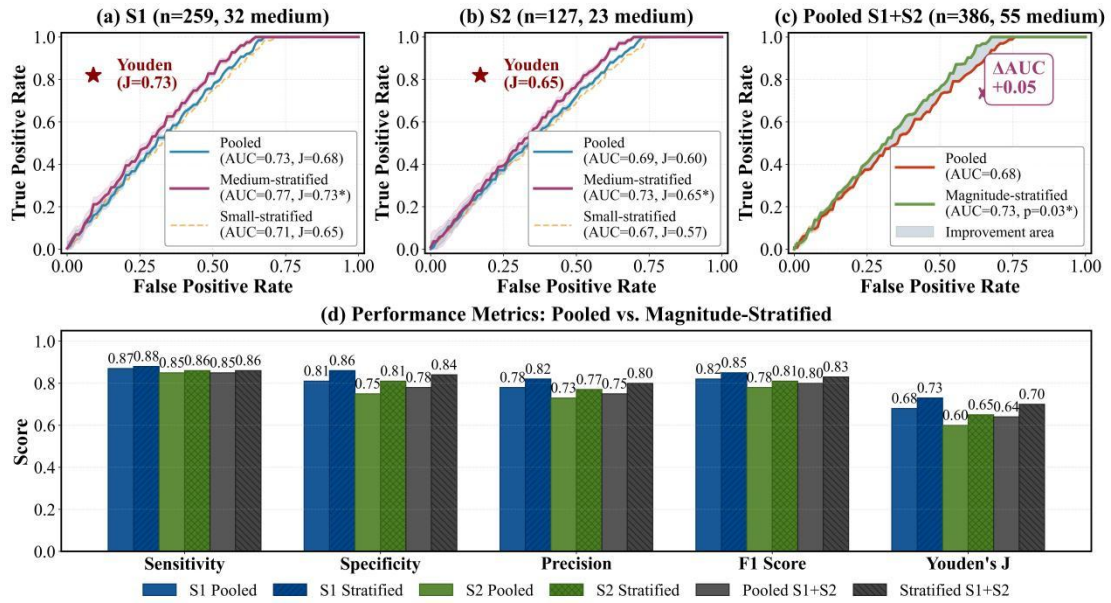

**Figure S1** ROC curve comparison of magnitude-stratified versus pooled Accr6h thresholds for subsets.

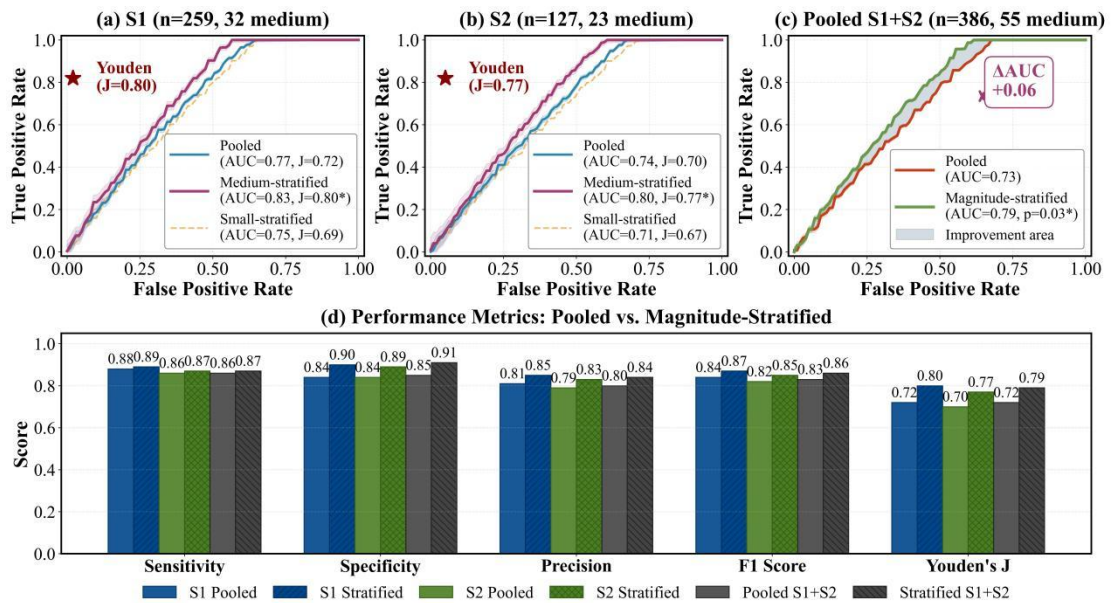

**Figure S2** ROC curve comparison of magnitude-stratified versus pooled Accr24h thresholds for subsets.

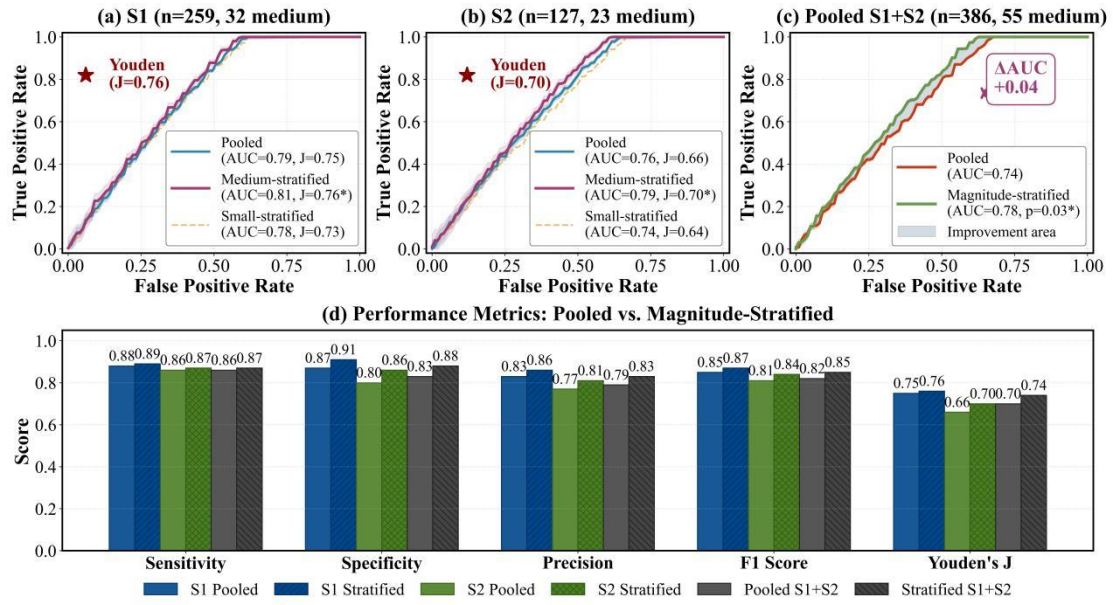

**Figure S3** ROC curve comparison of magnitude-stratified versus pooled AccR6h+Imax thresholds for subsets.

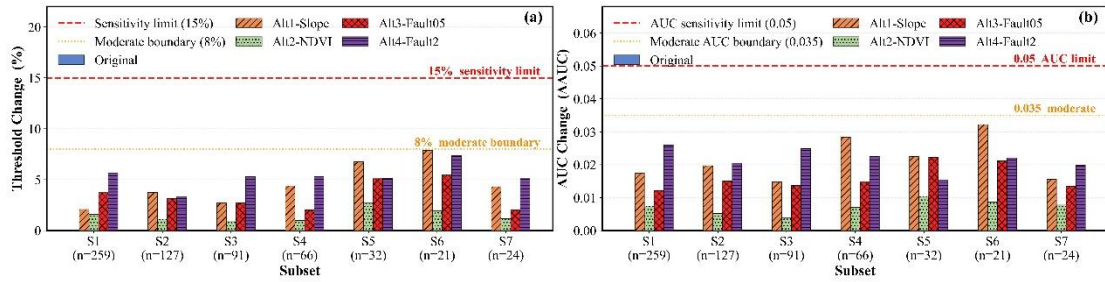

**Figure S4** Alternative scheme sensitivity of AccR6h across seven subsets: (a) threshold Change (%) and (b) AUC change.

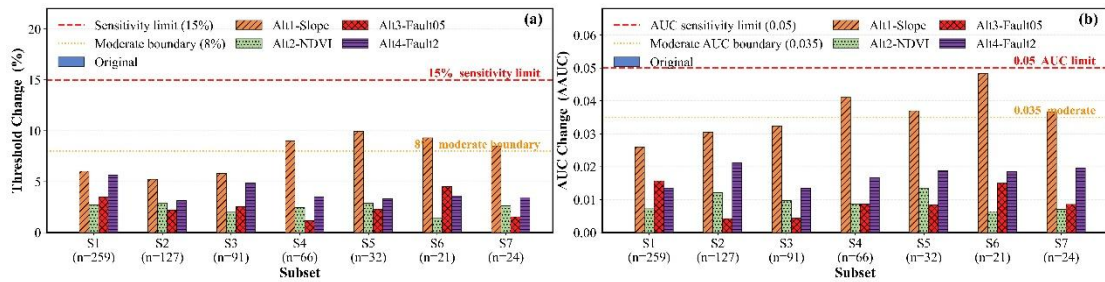

**Figure S5** Alternative scheme sensitivity of AccR24h across seven subsets: (a) threshold Change (%) and (b) AUC change.

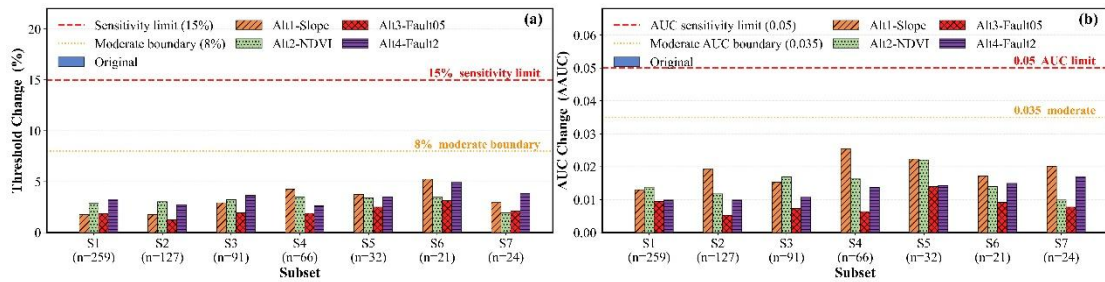

**Figure S6** Alternative scheme sensitivity of Imax across seven subsets: (a) threshold Change (%) and (b) AUC change.

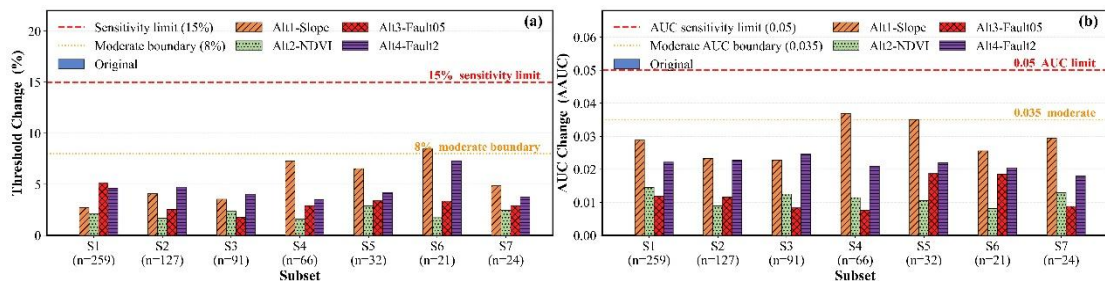

**Figure S7** Alternative scheme sensitivity of AccR6h+Imax across seven subsets: (a) threshold Change (%) and (b) AUC change.

**Table S1** Robustness metrics for AccR6h thresholds under alternative classification schemes.

| Subset | 95% CI | CI Tier  | Max $\Delta$ Threshold (%) | Max $\Delta$ AUC (%) | Robustness |
|--------|--------|----------|----------------------------|----------------------|------------|
| S1     | 0.0189 | Low      | 5.7                        | 2.6                  | Pass       |
| S2     | 0.0278 | Low      | 3.7                        | 2.1                  | Pass       |
| S3     | 0.0333 | Low      | 5.3                        | 2.5                  | Pass       |
| S4     | 0.0396 | Low      | 5.3                        | 2.8                  | Pass       |
| S5     | 0.0585 | Low      | 6.8                        | 2.2                  | Pass       |
| S6     | 0.0734 | Moderate | 7.9                        | 3.2                  | Pass       |
| S7     | 0.0683 | Moderate | 5.1                        | 2.0                  | Pass       |

*Note:* Pass criteria: threshold change  $\leq 15\%$ ,  $|\Delta\text{AUC}| \leq 0.05$ . Values represent maxima across Alt1–Slope, Alt2–NDVI, Alt3–Fault  $\leq 0.5$  km, and Alt4–Fault  $\leq 2$  km.

**Table S2** Robustness metrics for AccR24h thresholds under alternative classification schemes.

| Subset | 95% CI | CI Tier  | Max $\Delta$ Threshold (%) | Max $\Delta$ AUC (%) | Robustness      |
|--------|--------|----------|----------------------------|----------------------|-----------------|
| S1     | 0.0155 | Low      | 6.0                        | 2.6                  | Pass            |
| S2     | 0.0240 | Low      | 5.2                        | 3.0                  | Pass            |
| S3     | 0.0294 | Low      | 5.8                        | 3.2                  | Pass            |
| S4     | 0.0357 | Low      | 9.0                        | 4.1                  | Pass (marginal) |
| S5     | 0.0555 | Low      | 9.9                        | 3.7                  | Pass (marginal) |
| S6     | 0.0718 | Moderate | 9.3                        | 4.8                  | Pass (marginal) |
| S7     | 0.0662 | Moderate | 8.5                        | 3.7                  | Pass (marginal) |

*Note:* Pass criteria: threshold change  $\leq 15\%$ ,  $|\Delta\text{AUC}| \leq 0.05$ . Values represent maxima across Alt1–Slope, Alt2–NDVI, Alt3–Fault  $\leq 0.5$  km, and Alt4–Fault  $\leq 2$  km.

**Table S3** Robustness metrics for I<sub>max</sub> thresholds under alternative classification schemes.

| Subset | 95% CI | CI Tier  | Max $\Delta$ Threshold (%) | Max $\Delta$ AUC (%) | Robustness |
|--------|--------|----------|----------------------------|----------------------|------------|
| S1     | 0.0195 | Low      | 3.3                        | 1.4                  | Pass       |
| S2     | 0.0282 | Low      | 3.0                        | 1.9                  | Pass       |
| S3     | 0.0335 | Low      | 3.7                        | 1.7                  | Pass       |
| S4     | 0.0396 | Low      | 4.3                        | 2.5                  | Pass       |
| S5     | 0.0577 | Low      | 3.8                        | 2.2                  | Pass       |
| S6     | 0.0719 | Moderate | 5.2                        | 1.7                  | Pass       |
| S7     | 0.0670 | Moderate | 3.9                        | 2.0                  | Pass       |

*Note:* Pass criteria: threshold change  $\leq 15\%$ ,  $|\Delta\text{AUC}| \leq 0.05$ . Values represent maxima across Alt1–Slope, Alt2–NDVI, Alt3–Fault  $\leq 0.5$  km, and Alt4–Fault  $\leq 2$  km.

**Table S4** Robustness metrics for AccR6h+Imax thresholds under alternative classification schemes.

| Subset | 95% CI | CI Tier  | Max $\Delta$ Threshold (%) | Max $\Delta$ AUC (%) | Robustness      |
|--------|--------|----------|----------------------------|----------------------|-----------------|
| S1     | 0.0178 | Low      | 5.2                        | 2.9                  | Pass            |
| S2     | 0.0265 | Low      | 4.7                        | 2.3                  | Pass            |
| S3     | 0.0320 | Low      | 4.0                        | 2.5                  | Pass            |
| S4     | 0.0383 | Low      | 7.3                        | 3.7                  | Pass (marginal) |
| S5     | 0.0574 | Low      | 6.5                        | 3.5                  | Pass (marginal) |
| S6     | 0.0727 | Moderate | 8.5                        | 2.6                  | Pass (marginal) |
| S7     | 0.0675 | Moderate | 4.8                        | 2.9                  | Pass            |

Note: Pass criteria: threshold change  $\leq 15\%$ ,  $|\Delta \text{AUC}| \leq 0.05$ . Values represent maxima across Alt1 - Slope, Alt2 - NDVI, Alt3 - Fault  $\leq 0.5$  km, and Alt4 - Fault  $\leq 2$  km.

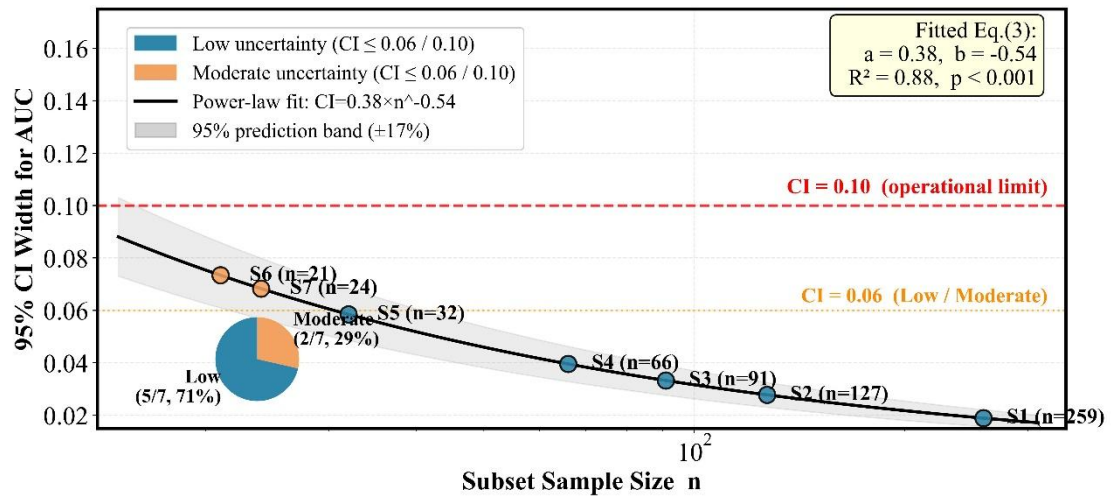

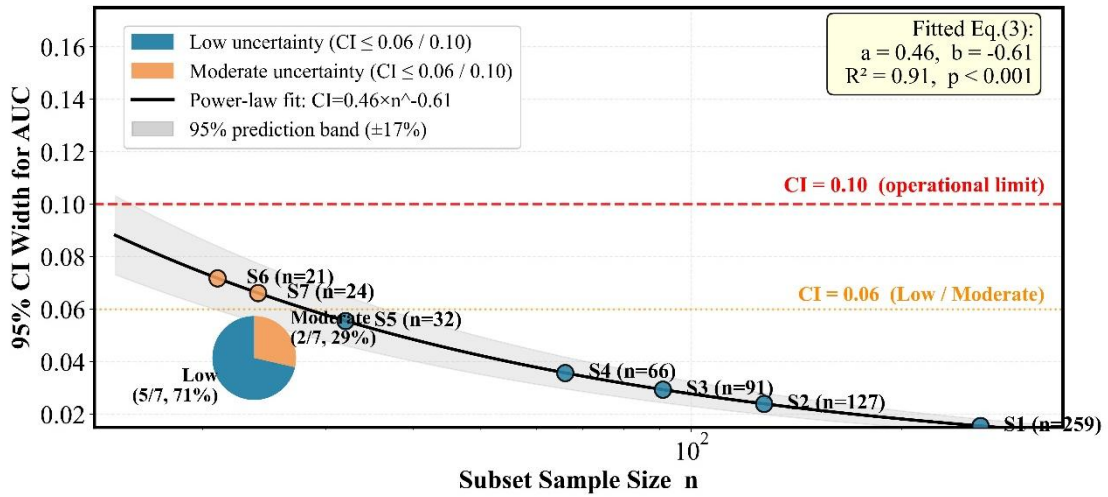

Figure S9 Sample size constraints for Accr24h thresholds.

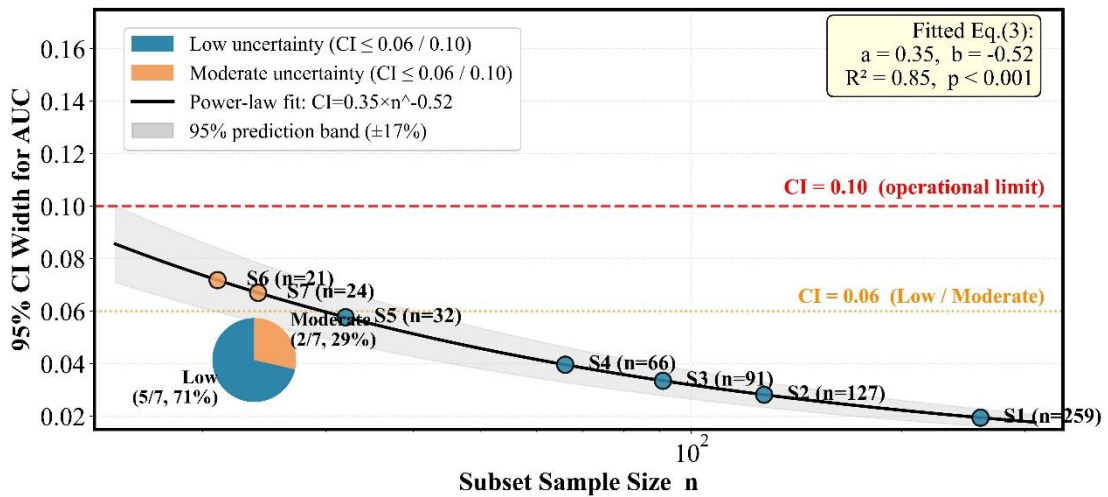

Figure S10 Sample size constraints for Imax thresholds.

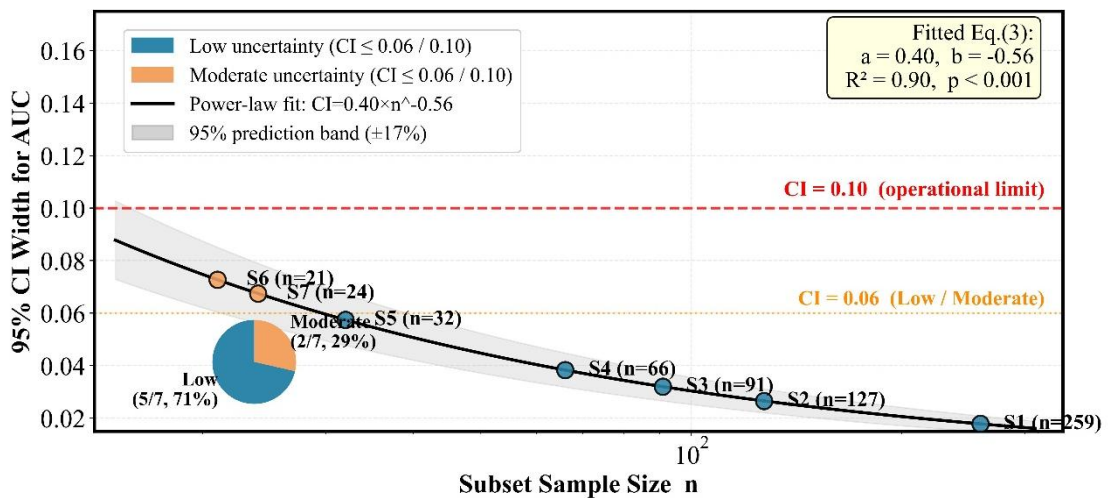

Figure S11 Sample size constraints for Accr6h+Imax thresholds.
